# Supplementary material for: miR-29 Represses the Activities of DNA Methyltransferases and DNA Demethylases
Source: Int J Mol Sci. 2013 Jul 12;14(7):14647–58. doi: 10.3390/ijms140714647 (PMC3742264; doi:10.3390/ijms140714647)

# Supplementary Information

**Figure S1.** Members of the miR-29 family impact endogenous TET1 protein. Western blots of TET1 were performed 48 h after transfection of A549 or PC9 cells with miR-29 or control miRNA.

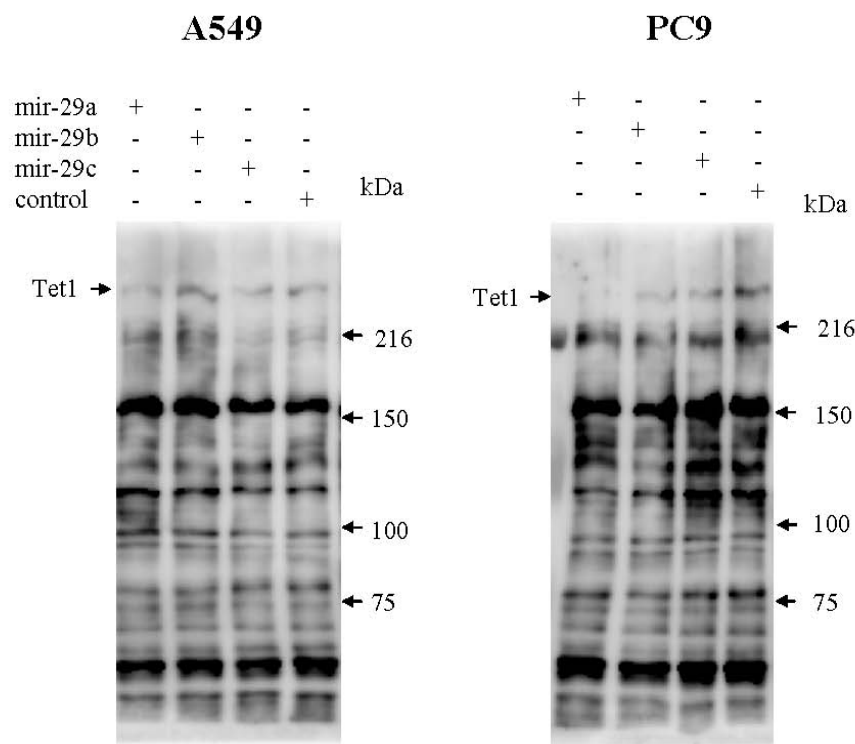

**Figure S2.** Members of the miR-29 family impact endogenous TDG protein. Western blots of TDG were performed 48 h after transfection of A549 or PC9 cells with miR-29 or control miRNA.

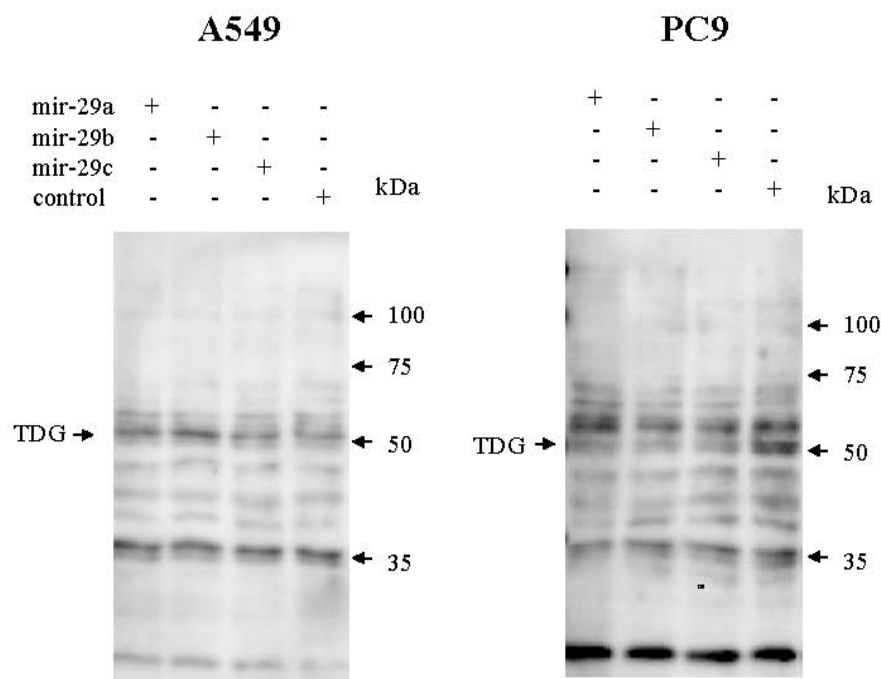

**Figure S3.** Members of the miR-29 family impact endogenous DNMT3A protein. Western blots of DNMT3A were performed 48 h after transfection of A549 or PC9 cells with miR-29 or control miRNA.

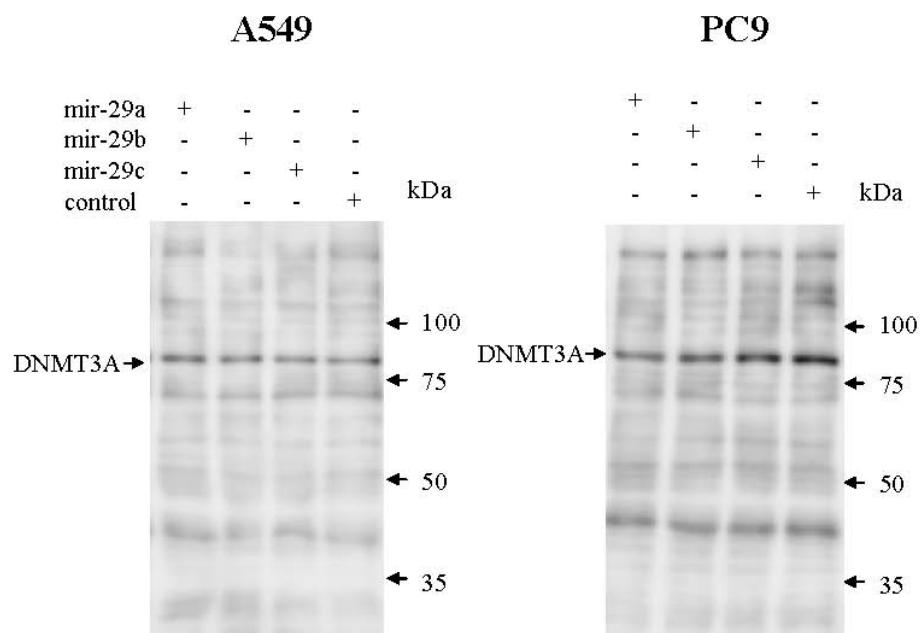

**Figure S4.** Members of the miR-29 family impact endogenous DNMT3B protein. Western blots of DNMT3B were performed 48 h after transfection of A549 or PC9 cells with miR-29 or control miRNA.

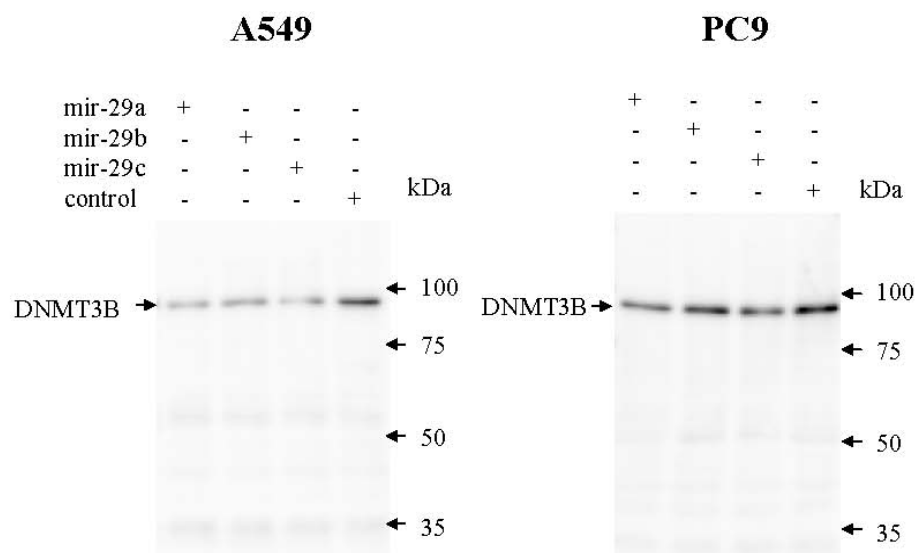

**Figure S5.** Western blots of control tubulin were performed 48 h after transfection of A549 or PC9 cells with miR-29 or control miRNA.

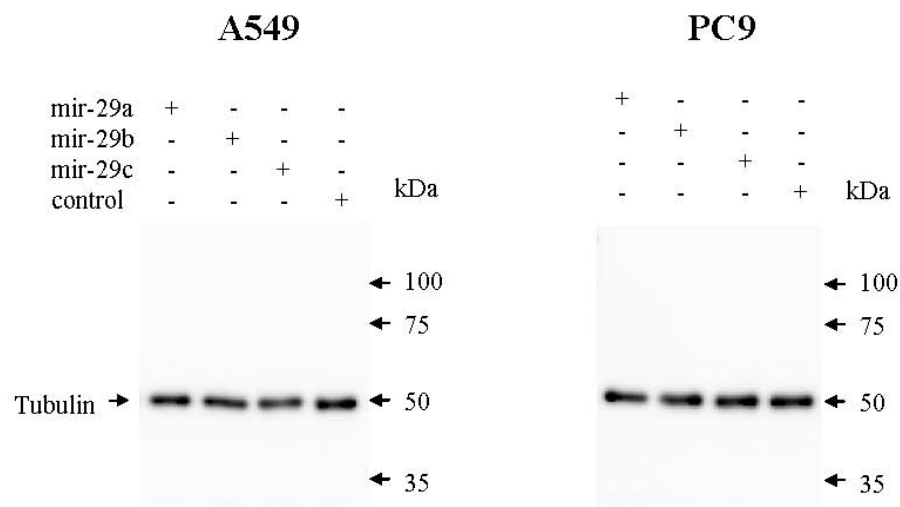

**Figure S6.** Members of the miR-29 family impact endogenous targets. Band intensity of the Western blot of TET1, TDG, DNMT3A and DNMT3B performed 48 h after transfection of A549 or PC9 cells with miR-29 or control miRNA.

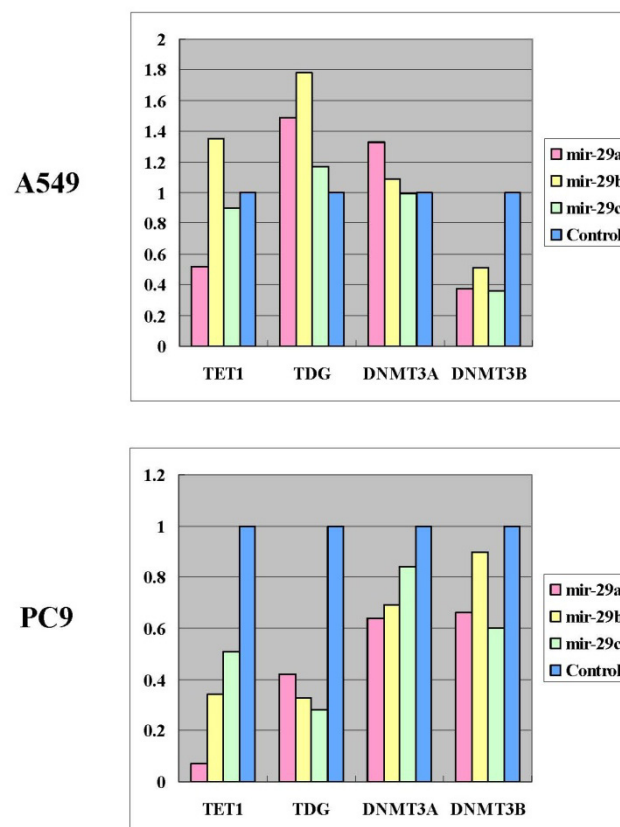

Supplement: Supplementary file 1 [file ijms-14-14647-s001.pdf]
